# Supplementary material for: Multivariate Genome-Wide Association Study of Concentrations of Seven Elements in Seeds Reveals Four New Loci in Russian Wheat Lines
Source: Plants (Basel). 2023 Aug 22;12(17):3019. doi: 10.3390/plants12173019 (PMC10489822; doi:10.3390/plants12173019)
Supplement: Supplementary file 1 [file plants-12-03019-s001.zip › Supplementary Tables Wheat GWAS.xlsx]

## Sheet: Suppl. Table S1
Supplementary Table S1. Dispersion values of element concentration in studied samples.
Element	2018	2019
Ca	101377	96541.1
Cu	1.29031	0.848801
Fe	69.0869	62.6121
K	331479	735140
Mg	41129	42201.6
Mn	29.5297	66.6642
Zn	51.9276	129.528

## Sheet: Suppl. Table S2
Suppl. Table S2. Proportion of the explained variance of elements concentrations considering effect of year and line separately. Significant p-values are highlighted.
	p_value_Line_ANOVA	Proportion of the explained variance (Line)	p_value_Year_ANOVA	Proportion of the explained variance (Year)
Ca	1.7e-07	0.6439988	3.37e-05	0.02855696
Cu	0.167	0.5271478	<2e-16	0.1445746
Fe	0.202	0.5233735	5.19e-08	0.04871969
K	<2e-16	0.7569699	0.0207	0.008982945
Mg	0.529	0.3453275	<2e-16	0.3030647
Mn	0.00704	0.5700352	0.013	0.01033813
Zn	0.999	0.4100304	<2e-16	0.2406469

## Sheet: Suppl. Table S3
Supplementary Table S3. Lambda values from GWAS meta-analysis.
Element	Lambda
Ca	1.05758
Cu	1.17132
K	1.06412
Fe	1.04403
Mg	1.01903
Mn	1.12703
Zn	0.987626

## Sheet: Suppl. Table S4
Supplementary Table S4. Lambda values from multivariate GWAS.
Cluster	Lambda
Cluster 1 (Ca and K)	1.05954
Cluster 2 (Fe and Mn)	1.09862
Cluster 3 (Mg and Zn)	0.971934
Cluster 4 (all elements)	1.10487

## Sheet: Suppl. Table S5
Suppl. Table S5. Replication of loci from [11] and [13]. In green is locus with significant p-value
Trait	Locus name	Chromosome	Link	p-value in trait meta-analysis	p-value in MV analysis
Ca	Excalibur_c41752_392	3B	[11]	0.7228	0.8286 (Ca+K), 0.6361 (all)
	BS00057451_51	3B	[11]	0.7184	0.8541 (Ca+K), 0.6863 (all)
	Kukri_c41797_393	5A	[13]	0.6384	0.8932 (Ca+K), 0.8801 (all)
	RFL_Contig2187_1025	5A	[13]	0.6384	0.8932 (Ca+K), 0.8801 (all)
Mn	IAAV6731	1B	[13]	0.4332	0.2785 (Fe+Mn), 0.7116 (all)
	JD_c3116_778	1B	[13]	0.1982	0.2307 (Fe+Mn), 0.7244 (all)
	Ra_c37969_549	1B	[13]	0.4115	0.2410 (Fe+Mn), 0.6524 (all)
	RAC875_rep_c119728_146	1B	[13]	0.1653	0.1418 (Fe_Mn), 0.5311 (all)
	TA003725-0553	1B	[13]	0.1375	0.1361 (Fe+Mn), 0.5220 (all)
	BS00022920_51	1B	[13]	0.1653	0.1418 (Fe+Mn), 0.5311 (all)
	Tdurum_contig81102_102	1B	[13]	0.1653	0.1418 (Fe+Mn), 0.5311 (all)
	BobWhite_rep_c66032_270	1B	[13]	0.2091	0.434 (Fe+Mn), 0.3006 (all)
	wsnp_BE443332B_Ta_2_2	1B	[13]	0.2496	0.5167 (Fe+Mn), 0.3745 (all)
Fe	Ex_c25027_535	7D	[13]	0.4226	0.3393 (Fe+Mn), 0.5573 (all)
	Excalibur_c833_1405	7D	[13]	0.6665	0.8516 (Fe+Mn), 0.6159 (all)
	Kukri_rep_c103404_314	7D	[13]	0.6723	0.7601 (Fe+Mn), 0.8220 (all)
	BS00022449_51	7D	[13]	0.5362	0.3065 (Fe+Mn), 0.5621 (all)
	BS00110642_51	7D	[13]	0.1872	0.1964 (Fe+Mn), 0.4907 (all)
	TA005377-1076	7D	[13]	0.5416	0.8052 (Fe+Mn), 0.9727 (all)
Zn	BS00072941_51	7B	[13]	0.8365	0.7159 (Mg+Zn), 0.5955 (all)
	Kukri_c78330_327	7B	[13]	0.7859	0.7102 (Mg+Zn), 0.5917 (all)
	RFL_Contig2540_306	7B	[13]	0.7124	0.6177 (Mg+Zn), 0.7204 (all)
	BS00095819_51	7B	[13]	0.7192	0.6498 (Mg+Zn), 0.7164 (all)
	Tdurum_contig75931_1967	7B	[13]	0.8365	0.7159 (Mg+Zn), 0.5955 (all)
	wsnp_Ex_c9428_15641609	7A	[13]	0.678	0.8336 (Mg+Zn), 0.1780 (all)
	wsnp_Ex_c9428_15641639	7A	[13]	0.4891	0.5888 (Mg+Zn), 0.1252 (all)
	Excalibur_c41752_392	3B	[13]	0.7819	0.6543 (Mg+Zn), 0.6361 (all)
	BS00057451_51	3B	[13]	0.9791	0.6508 (Mg+Zn), 0.6863 (all)
Zn	Kukri_c12683_1309	1A	[13]	0.7139	0.6076 (Mg+Zn), 0.4467 (all)
	BS00022982_51	2A	[13]	0.2815	0.4931 (Mg+Zn), 0.8067 (all)
	GENE-0749_215	2A	[13]	0.5351	0.8126 (Mg+Zn), 0.8534 (all)
	Ku_c19185_1569	2D	[13]	0.4682	0.645 (Mg+Zn), 0.6598 (all)
	Kukri_c14902_1112	2D	[13]	0.9571	0.894 (Mg+Zn), 0.7142 (all)
	IAAV1375	5A	[13]	0.001065	0.0029 (Mg+Zn), 0.0020 (all)
	Ra_c7673_1788	6B	[13]	0.7374	0.7662 (Mg+Zn), 0.3819 (all)
